# Supplementary material
Source: Springer Nature journal article supplement (https://www.springermedizin.de/resource/supplementary/13013_2006_24_MOESM1_ESM.pdf/9631026)

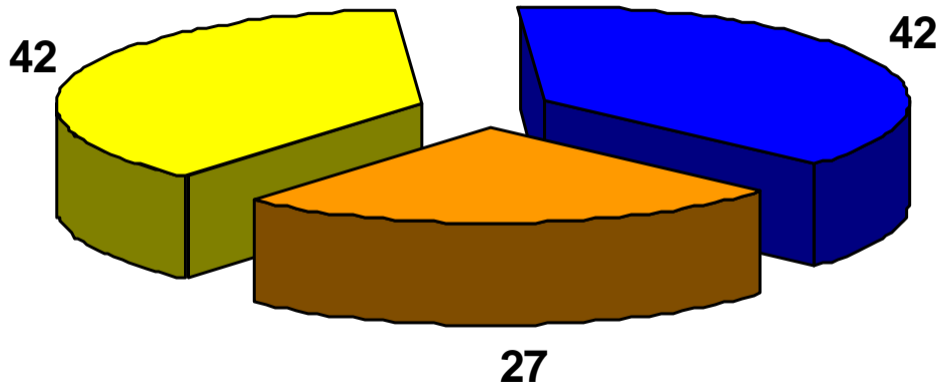

- Single Th
- Single Th-L or single L
- Double Th and L or Th and Th-L

Supplement: MOESM1 [file 9631026]
